# Supplementary material for: The neglected bee trees: European beech forests as a home for feral honey bee colonies
Source: PeerJ. 2018 Apr 6;6:e4602. doi: 10.7717/peerj.4602 (PMC5890725; doi:10.7717/peerj.4602)
Supplement: Supplemental Information 4 — Detailed list of all beelinies obtained in the Hainich National Park. All feeding locations where bees were caught are highlighted yellow and the coordinates, date and time are given. For every marked individual bee we calculated from the round trip time the maximum distance to the nest site. With the flight direction of this individual bee the coordinates to the predicted bee tree are given. Some beelines are highlighted in light grey, they are either missing round trip time or flight direction. [file peerj-06-4602-s004.xlsx]

## Sheet: Tabelle1
Bee tree	A
Date	2016-08-31								incomplete dataset
Time	17:40:00
Feeder location coordinates	51.0806	10.425
							feeder location coordinates		calculated nest site location coordinates
Individual bee colour code	time feeder left	time when returned to feeder	flight direction [°]	notes	round trip time [min]	calculated maximum nest distance [m]	N	E	N	E
R–	17:59:00	18:09:30	260		10.5	1923.75	51.0806	10.425	51.0776	10.3978
G–	18:02:00	18:13:30		no directional information	11.5	2166.75	51.0806	10.425
B–	18:03:00	18:11:00	210		8	1316.25	51.0806	10.425	51.0703	10.4155
Gr–	18:04:30	18:12:30	210		8	1316.25	51.0806	10.425	51.0703	10.4155
–B	18:24:00	18:31:00	255		7	1073.25	51.0806	10.425	51.0781	10.4101
–R	18:15:00	18:25:00	225		10	1802.25	51.0806	10.425	51.0691	10.4067
–G	18:21:00	18:31:00		no directional information	10	1802.25	51.0806	10.425
–W	18:15:30	18:24:00		no directional information	8.5	1437.75	51.0806	10.425
Gr–	18:15:00	18:23:00	225		8	1316.25	51.0806	10.425	51.0722	10.4116
R–	18:22:00	18:30:00	255		8	1316.25	51.0806	10.425	51.0775	10.4067
B–	18:22:00	18:28:00	250		6	830.25	51.0806	10.425	51.078	10.4138
Gr–	18:25:00	18:33:00	235		8	1316.25	51.0806	10.425	51.0738	10.4095
W–	18:25:00	18:34:00		no directional information	9	1559.25	51.0806	10.425
–W	18:25:00	18:32:00	260		7	1073.25	51.0806	10.425	51.0789	10.4098
–R	18:27:30	18:35:30	255		8	1316.25	51.0806	10.425	51.0775	10.4067
G–	18:31:00	18:41:00	255		10	1802.25	51.0806	10.425	51.0764	10.4
B–	18:31:00	18:36:00	255	used for predicting bee tree A	5	587.25	51.0806	10.425	51.0792	10.4168
R–	18:31:30	18:39:00	255		7.5	1194.75	51.0806	10.425	51.0778	10.4084
–W	18:35:00	18:42:30		no directional information	7.5	1194.75	51.0806	10.425
–R	18:37:20	18:43:40	255		6.33	910.44	51.0806	10.425	51.0785	10.4124
Bee tree	A
Date	2016-09-01
Time	11:45:00
Feeder location coordinates	51.0803	10.4208
							feeder location coordinates		calculated nest site location coordinates
Individual bee colour code	time feeder left	time when returned to feeder	flight direction [°]		round trip time [min]	calculated maximum nest distance [m]	N	E	N	E
GR–	12:04:30	12:10:00			5.5	708.75	51.0803	10.4208
HB–	12:07:30	12:16:30			9	1559.25	51.0803	10.4208
W–	12:05:00	12:15:00			10	1802.25	51.0803	10.4208
G–	12:08:30	12:17:00			8.5	1437.75	51.0803	10.4208
–B	12:10:00	12:13:30		used for predicting bee tree A	3.5	222.75	51.0803	10.4208
Bee tree	C and D
Date	2016-09-01
Time	15:30:00
Feeder location coordinates	51.0868	10.4025
							feeder location coordinates		calculated nest site location coordinates
Individual bee colour code	time feeder left	time when returned to feeder	flight direction [°]	notes	round trip time [min]	calculated maximum nest distance [m]	N	E	N	E
GR–	16:05:00	16:20:00		no directional information	15	3017.25	51.0868	10.4025
R–	16:07:00	16:21:00		no directional information	14	2774.25	51.0868	10.4025
B–	16:08:30	16:30:00	155		21.5	4596.75	51.0868	10.4025	51.0492	10.4304
W–	16:15:00	16:27:00		no directional information	12	2288.25	51.0868	10.4025
G–	16:16:30	16:28:30		no directional information	12	2288.25	51.0868	10.4025
–W	16:18:30	16:32:00		no directional information	13.5	2652.75	51.0868	10.4025
–B	16:23:00	16:38:00		no directional information	15	3017.25	51.0868	10.4025
R–	16:24:30	16:36:30		no directional information	12	2288.25	51.0868	10.4025
GR-W	16:29:00	16:41:00		no directional information	12	2288.25	51.0868	10.4025
GrGr	16:30:00	16:39:30		no directional information	9.5	1680.75	51.0868	10.4025
G–	16:29:30	16:41:30	145	used for predicting bee tree D	12	2288.25	51.0868	10.4025	51.0699	10.4214
B–	16:32:00	16:50:30	155		18.5	3867.75	51.0868	10.4025	51.0552	10.426
R–	16:38:30	16:51:00		no directional information	12.5	2409.75	51.0868	10.4025
GrGr	16:41:00	16:51:30	100	used for predicting bee tree C	10.5	1923.75	51.0868	10.4025	51.0838	10.4297
Gr–	16:47:30	17:02:30		no directional information	15	3017.25	51.0868	10.4025
unmarked			255	only directional information, 5000m distance estimated		5000	51.0868	10.4025	51.0751	10.3333
Bee tree	-
Date	2016-09-01
Time	18:30:00
Feeder location coordinates	51.0906	10.4219
							feeder location coordinates		calculated nest site location coordinates
Individual bee colour code	time feeder left	time when returned to feeder	flight direction [°]	notes	round trip time [min]	calculated maximum nest distance [m]	N	E	N	E
Gr–	18:41:20	19:07:00	110		25.66	5607.63	51.0906	10.4219	51.0733	10.4975
W–	18:47:30	18:57:45	155		10.25	1863	51.0906	10.4219	51.0754	10.4332
W–			155	no directional information			51.0906	10.4219
Gr–			185	no directional information			51.0906	10.4219
Bee tree	B
Date	2016-09-02
Time	10:40:00
Feeder location coordinates	51.0753	10.4703
							feeder location coordinates		calculated nest site location coordinates
Individual bee colour code	time feeder left	time when returned to feeder	flight direction [°]	notes	round trip time [min]	calculated maximum nest distance [m]	N	E	N	E
B–	11:17:00	11:42:00		no directional information	25	5447.25	51.0753	10.4703
W–	11:27:00	11:49:00		no directional information	22	4718.25	51.0753	10.4703
Gr–	11:40:00	11:56:00		no directional information	16	3260.25	51.0753	10.4703
B–	11:46:00	12:23:30		no directional information	37.5	8484.75	51.0753	10.4703
G–	11:42:00	12:07:00		no directional information	25	5447.25	51.0753	10.4703
R–	11:52:00	12:04:00		no directional information	12	2288.25	51.0753	10.4703
–Gr	11:57:00	12:26:30		no directional information	29.5	6540.75	51.0753	10.4703
W–	11:54:00	12:09:30	235		15.5	3138.75	51.0753	10.4703	51.0591	10.4334
–HB	11:57:00	12:11:00		no directional information	14	2774.25	51.0753	10.4703
–W	11:58:00	12:15:00	100		17	3503.25	51.0753	10.4703	51.0698	10.5198
Gr–	11:59:30	12:17:00		no directional information	17.5	3624.75	51.0753	10.4703
HB–	12:04:30	12:34:00	195		29.5	6540.75	51.0753	10.4703	51.0184	10.446
R–	12:06:30	12:24:00	235		17.5	3624.75	51.0753	10.4703	51.0566	10.4277
W–	12:10:30	12:28:00		no directional information	17.5	3624.75	51.0753	10.4703
G–	12:13:00	12:34:00	105		21	4475.25	51.0753	10.4703	51.0649	10.5323
–HB	12:14:30	12:24:30		no directional information	10	1802.25	51.0753	10.4703
–W	12:17:30	12:37:00	110		19.5	4110.75	51.0753	10.4703	51.0626	10.5257
Gr–	12:18:30	12:36:30		no directional information	18	3746.25	51.0753	10.4703
WW	12:21:30	12:34:00	340		12.5	2409.75	51.0753	10.4703	51.0957	10.4585
–HB	12:38:30	12:52:30		no directional information	14	2774.25	51.0753	10.4703
R–	12:28:00	12:44:00	220		16	3260.25	51.0753	10.4703	51.0528	10.4403
–Gr	12:33:00	12:53:00		no directional information	20	4232.25	51.0753	10.4703
W–	12:30:00	12:47:30	230		17.5	3624.75	51.0753	10.4703	51.0543	10.4305
WW	12:36:30	12:46:30		no directional information	10	1802.25	51.0753	10.4703
Hb–	12:36:30	13:09:30	220		33	7391.25	51.0753	10.4703	51.0243	10.4022
Gr–	12:38:00	12:59:30	105		21.5	4596.75	51.0753	10.4703	51.0646	10.534
G–	12:41:30	13:04:00	105		22.5	4839.75	51.0753	10.4703	51.064	10.5373
–G	12:48:30	13:08:30		no directional information	20	4232.25	51.0753	10.4703
–R	12:46:30	12:57:30		no directional information	11	2045.25	51.0753	10.4703
WW	12:48:00	12:57:30		no directional information	9.5	1680.75	51.0753	10.4703
R–	12:49:30	13:06:00		no directional information	16.5	3381.75	51.0753	10.4703
Gr–	12:56:30	13:12:30	110		16	3260.25	51.0753	10.4703	51.0652	10.5142
WW	12:59:30	13:07:30	325	used for predicting bee tree B	8	1316.25	51.0753	10.4703	51.085	10.4595
–R			325	only directional information			51.0753	10.4703
–W	13:01:00	13:21:00		no directional information	20	4232.25	51.0753	10.4703
W–	13:09:00	13:25:00		no directional information	16	3260.25	51.0753	10.4703
WW	13:09:30	13:18:30		no directional information	9	1559.25	51.0753	10.4703
B–			320	only directional information			51.0753	10.4703
–R	13:17:00	13:26:00		no directional information	9	1559.25	51.0753	10.4703
Bee tree	B
Date	2016-09-02
Time	13:40:00
Feeder location coordinates	51.0764	10.4701
							feeder location coordinates		calculated nest site location coordinates
Individual bee colour code	time feeder left	time when reteurned to feeder	flight direction [°]	notes	round trip time [min]	calculated maximum nest distance [m]	N	E	N	E
GrW	13:44:00	13:55:00		no directional information	11	2045.25	51.0764	10.4701
WW	14:14:15	14:25:15		no directional information	11	2045.25	51.0764	10.4701
–R	14:20:45	14:32:30		no directional information	11.75	2227.5	51.0764	10.4701
WW	14:27:00	14:35:00		no directional information	8	1316.25	51.0764	10.4701
GrW	14:30:20	14:42:40		no directional information	12.33	2368.44	51.0764	10.4701
GG	14:30:30	14:39:00		no directional information	8.5	1437.75	51.0764	10.4701
–R	14:34:30	14:44:00		no directional information	9.5	1680.75	51.0764	10.4701
WW	14:37:00	14:45:30		no directional information	8.5	1437.75	51.0764	10.4701
GrW	14:41:00	14:51:00		no directional information	10	1802.25	51.0764	10.4701
WW	14:47:30	14:55:00	310	used for predicting bee tree B	7.5	1194.75	51.0764	10.4701	51.0833	10.457
Bee tree	B
Date	2016-09-02
Time	15:30:00
Feeder location coordinates	51.0825	10.4652
							feeder location coordinates		calculated nest site location coordinates
Individual bee colour code	time feeder left	time when reteurned to feeder	flight direction [°]	notes	round trip time [min]	calculated maximum nest distance [m]	N	E	N	E
GrR	15:57:40	16:03:00		no directional information	5.33	667.44	51.0825	10.4652
HBR	15:57:00	16:27:00		no directional information	30	6662.25	51.0825	10.4652
WR	16:07:00	16:15:00		no directional information	8	1316.25	51.0825	10.4652
–G	16:06:00	16:18:30		no directional information	12.5	2409.75	51.0825	10.4652
GR	16:06:00	16:17:00		no directional information	11	2045.25	51.0825	10.4652
–Gr	16:15:30	16:24:30		no directional information	9	1559.25	51.0825	10.4652
GrRG	16:11:45	16:19:30		no directional information	7.75	1255.5	51.0825	10.4652
GrR	16:14:30	16:19:30		no directional information	5	587.25	51.0825	10.4652
–R	16:08:30	16:24:20		no directional information	15.83	3218.94	51.0825	10.4652
WR	16:17:00	16:23:00		no directional information	6	830.25	51.0825	10.4652
GR	16:19:15	16:26:00	240		6.75	1012.5	51.0825	10.4652	51.0779	10.4526
–G	16:21:00	16:32:30		no directional information	11.5	2166.75	51.0825	10.4652
GrR	16:21:30	16:26:45		no directional information	5.25	648	51.0825	10.4652
GrRG	16:20:50	16:27:30		no directional information	6.67	993.06	51.0825	10.4652
GR	16:27:30	16:33:15		no directional information	5.75	769.5	51.0825	10.4652
GrRG	16:29:00	16:36:00		no directional information	7	1073.25	51.0825	10.4652
WR	16:32:30	16:38:00		no directional information	5.5	708.75	51.0825	10.4652
–R	16:39:30	16:43:30	230	used for predicting bee tree B	4	344.25	51.0825	10.4652	51.0805	10.4614
GG	16:36:00	16:42:00		no directional information	6	830.25	51.0825	10.4652
GrRG	16:38:00	16:45:30		no directional information	7.5	1194.75	51.0825	10.4652
WR	16:40:45	16:45:30		no directional information	4.75	526.5	51.0825	10.4652
Bee tree	B
Date	2016-09-02
Time	16:45:00
Feeder location coordinates	51.0812	10.4632
							feeder location coordinates		calculated nest site location coordinates
Individual bee colour code	time feeder left	time when reteurned to feeder	flight direction [°]	notes	round trip time [min]	calculated maximum nest distance [m]	N	E	N	E
HbHb	17:07:00	17:14:30		no directional information	7.5	1194.75	51.0812	10.4632
GrGr	17:08:00	17:17:30		no directional information	9.5	1680.75	51.0812	10.4632
WGr	17:10:15	17:15:00	260		4.75	526.5	51.0812	10.4632	51.0804	10.4557
HbHb	17:16:00	17:23:00		no directional information	7	1073.25	51.0812	10.4632
WGr	17:16:30	17:20:00		no directional information	3.5	222.75	51.0812	10.4632
WHb	17:17:00	17:27:30		no directional information	10.5	1923.75	51.0812	10.4632
GrGr	17:18:30	17:26:10		no directional information	7.66	1233.63	51.0812	10.4632
WGr	17:21:20	17:26:10		no directional information	4.83	545.94	51.0812	10.4632
HbHb	17:23:40	17:28:00		no directional information	4.33	424.44	51.0812	10.4632
WGr	17:27:45	17:33:20		no directional information	5.58333	729	51.0812	10.4632
WHb	17:29:00	17:36:00		no directional information	7	1073.25	51.0812	10.4632
HbHb	17:30:00	17:35:00		no directional information	5	587.25	51.0812	10.4632
WGr	17:35:00	17:40:00		no directional information	5	587.25	51.0812	10.4632
GrGr	17:36:00	17:42:30		no directional information	6.5	951.75	51.0812	10.4632
HbHb	17:36:50	17:39:50	225	used for predicting bee tree B	3	101.25	51.0812	10.4632	51.0805	10.4621
WHb	17:37:30	17:44:10		no directional information	6.66	990.63	51.0812	10.4632
HbHb	17:41:30	17:44:50		no directional information	3.33	181.44	51.0812	10.4632
WGr	17:42:00	17:46:45		no directional information	4.75	526.5	51.0812	10.4632
WHb	17:45:30	17:52:30		no directional information	7	1073.25	51.0812	10.4632
HbHb	17:46:30	17:50:00	225		3.5	222.75	51.0812	10.4632	51.0798	10.4609
WGr	17:48:30	17:53:45		no directional information	5.25	648	51.0812	10.4632
Bee tree	C
Date	2016-09-03
Time	11:30:00
Feeder location coordinates	51.061	10.4112
							feeder location coordinates		calculated nest site location coordinates
Individual bee colour code	time feeder left	time when reteurned to feeder	flight direction [°]	notes	round trip time [min]	calculated maximum nest distance [m]	N	E	N	E
G-	11:43:00	11:53:00	300		10	1802.25	51.061	10.4112	51.0691	10.3888
HB–	11:45:30	12:03:00		no directional information	17.5	3624.75	51.061	10.4112
W–	11:48:40	11:58:45		no directional information	10.0833	1822.5	51.061	10.4112
Gr–	11:49:30	11:59:30		no directional information	10	1802.25	51.061	10.4112
–R	11:49:45	12:03:20	5		13.5833	2673	51.061	10.4112	51.085	10.4145
–W	11:52:00	12:04:20		no directional information	12.33	2368.44	51.061	10.4112
–G	11:53:40	12:07:00		no directional information	13.33	2611.44	51.061	10.4112
–HB	11:52:40	12:01:00	20	used for predicting bee tree C	8.33	1396.44	51.061	10.4112	51.0728	10.418
–Gr	11:55:30	12:06:30		no directional information	11	2045.25	51.061	10.4112
G–	11:54:00	12:06:00	346		12	2288.25	51.061	10.4112	51.081	10.4032
GG	12:00:00	12:11:20		no directional information	12.83	2489.94	51.061	10.4112
Gr–	12:02:00	12:16:00		no directional information	14	2774.25	51.061	10.4112
HB–	12:04:00	12:12:20		no directional information	8.33	1396.44	51.061	10.4112
WW	12:03:00	12:17:20		no directional information	12.83	2489.94	51.061	10.4112
RR	12:04:30	12:17:20		no directional information	12.83	2489.94	51.061	10.4112
R–	12:04:30	12:14:00		no directional information	9.5	1680.75	51.061	10.4112
–HB	12:07:20	12:18:20	20		11	2045.25	51.061	10.4112	51.0783	10.4212
G–	12:07:00	12:20:00	40		13	2531.25	51.061	10.4112	51.0785	10.4345
–Gr	12:08:30	12:18:40		no directional information	10.16	1841.13	51.061	10.4112
GG	12:13:00	12:25:30		no directional information	12.5	2409.75	51.061	10.4112
R–	12:15:00	12:26:00	18		11	2045.25	51.061	10.4112	51.0785	10.4202
Hb–	12:14:30	12:25:00	23		10.5	1923.75	51.061	10.4112	51.077	10.4219
–W	12:17:00	12:28:00		no directional information	11	2045.25	51.061	10.4112
Gr–	12:18:40	12:29:00		no directional information	10.33	1882.44	51.061	10.4112
WW	12:19:30	12:30:00	10		10.5	1923.75	51.061	10.4112	51.0781	10.4159
–R	12:19:30	12:31:30		no directional information	12	2288.25	51.061	10.4112
Bee tree	C
Date	2016-09-03
Time	13:00:00
Feeder location coordinates	51.0693	10.4092
							feeder location coordinates		calculated nest site location coordinates
Individual bee colour code	time feeder left	time when reteurned to feeder	flight direction [°]	notes	round trip time [min]	calculated maximum nest distance [m]	N	E	N	E
WG	13:29:00	13:39:45		no directional information	10.75	1984.5	51.0693	10.4092
WGr	13:31:00	13:43:00		no directional information	12	2288.25	51.0693	10.4092
WB	13:39:00	13:45:00		no directional information	6	830.25	51.0693	10.4092
RG	13:49:50	13:56:50		no directional information	7	1073.25	51.0693	10.4092
WB	13:47:30	13:54:00		no directional information	6.5	951.75	51.0693	10.4092
RW	13:47:40	14:00:00		no directional information	12.33	2368.44	51.0693	10.4092
RB	13:48:50	13:57:20		no directional information	8.5	1437.75	51.0693	10.4092
BG	13:50:00	14:05:50		no directional information	15.83	3218.94	51.0693	10.4092
BGr	13:50:00	13:57:30		no directional information	7.5	1194.75	51.0693	10.4092
BR	13:52:00	14:02:30		no directional information	10.5	1923.75	51.0693	10.4092
RGr	13:51:00	13:56:40		no directional information	5.66	747.63	51.0693	10.4092
WG	13:52:30	14:02:00		no directional information	9.5	1680.75	51.0693	10.4092
WB	13:56:00	14:01:30		no directional information	5.5	708.75	51.0693	10.4092
WGr	13:59:00	14:08:00		no directional information	9	1559.25	51.0693	10.4092
RGr	13:58:20	14:03:00		used for predicting bee tree C	4.66	504.63	51.0693	10.4092
BGr	13:59:00	14:06:50		no directional information	7.83	1274.94	51.0693	10.4092
BW	14:04:10	14:10:00		no directional information	5.83	788.94	51.0693	10.4092
RGr	14:04:30	14:09:30		no directional information	5	587.25	51.0693	10.4092
Bee tree	C
Date	2016-09-03
Time	14:25:00
Feeder location coordinates	51.0728	10.4116
							feeder location coordinates		calculated nest site location coordinates
Individual bee colour code	time feeder left	time when reteurned to feeder	flight direction [°]	notes	round trip time [min]	calculated maximum nest distance [m]	N	E	N	E
–BGr	14:34:00	14:43:40		no directional information	9.66	1719.63	51.0728	10.4116
GrR	14:35:30	14:44:40		no directional information	9.16	1598.13	51.0728	10.4116
GrG	14:36:30	14:52:40		no directional information	16.16	3299.13	51.0728	10.4116
GGr	14:42:20	14:48:20		no directional information	6	830.25	51.0728	10.4116
GR	14:43:30	14:50:30		no directional information	7	1073.25	51.0728	10.4116
GW	14:44:10	14:54:20		no directional information	10.16	1841.13	51.0728	10.4116
GB	14:44:50	14:59:10		no directional information	14.33	2854.44	51.0728	10.4116
–BGr	14:45:40	14:53:10		no directional information	7.5	1194.75	51.0728	10.4116
GrR	14:46:00	14:55:40		no directional information	9.66	1719.63	51.0728	10.4116
G–	14:47:20	14:53:50		no directional information	6.5	951.75	51.0728	10.4116
–W	14:49:10	14:56:30		no directional information	7.33	1153.44	51.0728	10.4116
GGr	14:50:10	14:57:40		no directional information	7.5	1194.75	51.0728	10.4116
GR	14:52:00	14:57:30		no directional information	5.5	708.75	51.0728	10.4116
WR	14:53:00	15:03:50		no directional information	10.83	2003.94	51.0728	10.4116
–BGr	14:54:50	15:01:40		no directional information	6.83	1031.94	51.0728	10.4116
G–	14:55:00	15:01:00		no directional information	6	830.25	51.0728	10.4116
GW	14:55:50	15:02:30		no directional information	6.66	990.63	51.0728	10.4116
GrR	14:57:30	15:02:50		no directional information	5.33	667.44	51.0728	10.4116
GGr	14:58:30	15:02:50		used for predicting bee tree C	4.33	424.44	51.0728	10.4116
GR	14:59:00	15:04:50		no directional information	5.83	788.94	51.0728	10.4116
RG	15:00:00	15:08:30		no directional information	8.5	1437.75	51.0728	10.4116
GB	15:00:40	15:07:30		no directional information	6.83	1031.94	51.0728	10.4116
GGr	15:04:30	15:09:10		no directional information	4.66	504.63	51.0728	10.4116
Bee tree	C
Date	2016-09-03
Time	15:26:00
Feeder location coordinates	51.0708	10.4157
							feeder location coordinates		calculated nest site location coordinates
Individual bee colour code	time feeder left	time when reteurned to feeder	flight direction [°]	notes	round trip time [min]	calculated maximum nest distance [m]	N	E	N	E
GB	15:43:00	15:50:40		no directional information	7.66	1233.63	51.0708	10.4157
Gr–	15:50:20	15:58:30		no directional information	8.16	1355.13	51.0708	10.4157
–B	15:51:40	16:01:20		no directional information	9.66	1719.63	51.0708	10.4157
GB	15:52:10	15:59:00		no directional information	6.83	1031.94	51.0708	10.4157
–R	15:54:10	15:59:20		no directional information	5.16	626.13	51.0708	10.4157
B–	16:00:00	16:09:40		no directional information	9.66	1719.63	51.0708	10.4157
–Gr	16:05:40	16:07:20		extremely fast round trip time, used for predicting bee tree C	1.66	-224.37	51.0708	10.4157
–G	15:56:00	16:03:20		no directional information	7.33	1153.44	51.0708	10.4157
GrB	16:00:50	16:07:00		no directional information	6.16	869.13	51.0708	10.4157
GB	16:00:20	16:08:00		no directional information	7.66	1233.63	51.0708	10.4157
–R	16:01:30	16:07:40		no directional information	6.16	869.13	51.0708	10.4157
–B	16:03:10	16:10:20		no directional information	7.16	1112.13	51.0708	10.4157
Bee tree	C
Date	2016-09-03
Time	16:30:00
Feeder location coordinates	51.0722	10.4086
							feeder location coordinates		calculated nest site location coordinates
Individual bee colour code	time feeder left	time when reteurned to feeder	flight direction [°]	notes	round trip time [min]	calculated maximum nest distance [m]	N	E	N	E
BRG	16:50:50	17:25:00		no directional information	34.16	7673.13	51.0722	10.4086
–GBW	16:51:40	17:19:00		no directional information	27.33	6013.44	51.0722	10.4086
–GR	16:55:30	17:04:00		no directional information	8.5	1437.75	51.0722	10.4086
–RW	16:58:10	17:12:20		no directional information	14.16	2813.13	51.0722	10.4086
–B	16:59:30	17:20:00		no directional information	20.5	4353.75	51.0722	10.4086
–WG	17:01:40	17:16:10		no directional information	14.5	2895.75	51.0722	10.4086
–BW	17:01:40	17:11:50		no directional information	10.16	1841.13	51.0722	10.4086
–Gr	17:05:30	17:13:40		no directional information	8.16	1355.13	51.0722	10.4086
–GR	17:05:40	17:12:30		no directional information	6.83	1031.94	51.0722	10.4086
–DGr	17:09:20	17:16:30		no directional information	7.16	1112.13	51.0722	10.4086
–BW	17:14:20	17:19:50		no directional information	5.5	708.75	51.0722	10.4086
–GR	17:13:20	17:19:50		no directional information	6.5	951.75	51.0722	10.4086
–RW	17:14:20	17:21:40		no directional information	7.33	1153.44	51.0722	10.4086
WRW	17:15:30	17:22:30		no directional information	7	1073.25	51.0722	10.4086
violett	17:16:00	17:26:30		no directional information	10.5	1923.75	51.0722	10.4086
–Gr	17:15:00	17:23:20		no directional information	8.33	1396.44	51.0722	10.4086
–WG	17:17:50	17:25:10		no directional information	7.33	1153.44	51.0722	10.4086
–DGr	17:18:10	17:25:30		no directional information	7.33	1153.44	51.0722	10.4086
GrR	17:19:40	17:25:10		no directional information	5.5	708.75	51.0722	10.4086
Bee tree	F
Date	2017-06-18
Time	08:15:00
Feeder location coordinates	51.0745	10.496
							feeder location coordinates		calculated nest site location coordinates
Individual bee colour code	time feeder left	time when reteurned to feeder	flight direction [°]	notes	round trip time [min]	calculated maximum nest distance [m]	N	E	N	E
-	08:15:00	08:33:00	215		18	3746.25	51.0745	10.496	51.0468	10.4652
-	08:38:00	08:53:00	210		15	3017.25	51.0745	10.496	51.0509	10.4743
-	08:56:00	09:09:00	215	used for predicting bee tree F	13	2531.25	51.0745	10.496	51.0558	10.4752
G-	10:59:00	11:18:00	215		19	3989.25	51.0745	10.496	51.0451	10.4632
-			220	only directional information			51.0745	10.496
G-	11:21:30	11:40:00		no directional information	18.5	3867.75	51.0745	10.496
Bee tree	-
Date	2017-06-18
Time	13:15:00
Feeder location coordinates	51.0847	10.4253
							feeder location coordinates		calculated nest site location coordinates
Individual bee colour code	time feeder left	time when reteurned to feeder	flight direction [°]	notes	round trip time [min]	calculated maximum nest distance [m]	N	E	N	E
W-	13:15:00	13:31:00	120		16	3260.25	51.0847	10.4253	51.07	10.4658
W-	13:35:30	13:50:00	120		14.5	2895.75	51.0847	10.4253	51.0717	10.4613
W-	13:54:00	14:15:00		no directional information	21	4475.25	51.0847	10.4253
W-	14:18:00	14:36:00	110		18	3746.25	51.0847	10.4253	51.0732	10.4758
W-	14:39:00	15:16:30	150		37.5	8484.75	51.0847	10.4253	51.0185	10.4861
Bee tree	-
Date	2017-06-18
Time	13:15:00
Feeder location coordinates	51.0868	10.4025
							feeder location coordinates		calculated nest site location coordinates
Individual bee colour code	time feeder left	time when reteurned to feeder	flight direction [°]	notes	round trip time [min]	calculated maximum nest distance [m]	N	E	N	E
Ohne Farbe			310	only directional information			51.0868	10.4025
Bee tree	D
Date	2017-06-19
Time	09:25:00
Feeder location coordinates	51.0868	10.4263
							feeder location coordinates		calculated nest site location coordinates
Individual bee colour code	time feeder left	time when reteurned to feeder	flight direction [°]	notes	round trip time [min]	calculated maximum nest distance [m]	N	E	N	E
R–	09:37:30	09:47:00		no directional information	9.5	1680.75	51.0868	10.4263
G –	09:45:10	09:54:00		no directional information	8.83	1517.94	51.0868	10.4263
R–	09:45:30	09:57:30		no directional information	12	2288.25	51.0868	10.4263
–B	09:51:20	10:01:50	145	used for predicting bee tree D	10.5	1923.75	51.0868	10.4263	51.0727	10.4422
R–	09:58:50	10:04:10	110	no directional information	5.33	667.44	51.0868	10.4263	51.0848	10.4353
–B	10:03:15	10:22:50	145		19.5833	4131	51.0868	10.4263	51.0564	10.4603
R–	10:05:20	10:15:30		no directional information	10.16	1841.13	51.0868	10.4263
R–	10:16:40	10:28:30	110		11.83	2246.94	51.0868	10.4263	51.0799	10.4566
–B	10:24:00	10:40:00		no directional information	16	3260.25	51.0868	10.4263
Y –	10:27:00	10:35:40		no directional information	8.66	1476.63	51.0868	10.4263
R–	10:29:50	10:41:00	110		11.16	2084.13	51.0868	10.4263	51.0804	10.4544
Y –	10:37:15	10:47:00	105		9.75	1741.5	51.0868	10.4263	51.0828	10.4505
–B	10:41:20	10:52:50		no directional information	11.5	2166.75	51.0868	10.4263
R–	10:42:30	10:54:30		no directional information	12	2288.25	51.0868	10.4263
–W	10:45:10	10:58:10		no directional information	13	2531.25	51.0868	10.4263
–G	10:45:00	10:53:15		no directional information	8.25	1377	51.0868	10.4263
Y –	10:48:30	11:03:10		no directional information	14.66	2934.63	51.0868	10.4263
–R	10:55:30	11:04:10	110		8.66	1476.63	51.0868	10.4263	51.0823	10.4463
Bee tree	D
Date	2017-06-19
Time	12:00:00
Feeder location coordinates	51.0867	10.4294
							feeder location coordinates		calculated nest site location coordinates
Individual bee colour code	time feeder left	time when reteurned to feeder	flight direction [°]	notes	round trip time [min]	calculated maximum nest distance [m]	N	E	N	E
R–.2	12:07:50	12:17:50		no directional information	10	1802.25	51.0867	10.4294
–R.2	12:07:50	12:16:10		no directional information	8.33	1396.44	51.0867	10.4294
–O	12:11:50	12:20:40	110		8.83	1517.94	51.0867	10.4294	51.0821	10.4499
–R.2	12:17:50	12:28:00	103		10.16	1841.13	51.0867	10.4294	51.083	10.4551
R–.2	12:19:20	12:26:15	120	used for predicting bee tree D	6.91667	1053	51.0867	10.4294	51.082	10.4425
–O	12:21:45	12:35:00	130		13.25	2592	51.0867	10.4294	51.0717	10.4579
R–.2	12:27:30	12:35:50	110		8.33	1396.44	51.0867	10.4294	51.0824	10.4482
–R.2	12:29:40	12:37:30	125		7.83	1274.94	51.0867	10.4294	51.0802	10.4444
–O	12:35:50	12:44:00		no directional information	8.16	1355.13	51.0867	10.4294
Bee tree	D
Date	2017-06-19
Time	13:00:00
Feeder location coordinates	51.0853	10.4321
							feeder location coordinates		calculated nest site location coordinates
Individual bee colour code	time feeder left	time when reteurned to feeder	flight direction [°]	notes	round trip time [min]	calculated maximum nest distance [m]	N	E	N	E
–H	13:35:00	13:45:50		no directional information	10.83	2003.94	51.0853	10.4321
V–	13:38:50	13:48:50	135		10.83	2003.94	51.0853	10.4321	51.0725	10.4524
–V			175	only directional information			51.0853	10.4321
–G	13:45:10	13:54:50		no directional information	9.66	1719.63	51.0853	10.4321
–H	13:46:40	13:55:40		no directional information	9	1559.25	51.0853	10.4321
V–	13:50:10	13:56:40		no directional information	6.5	951.75	51.0853	10.4321
–G.2	13:55:30	14:05:30		no directional information	10	1802.25	51.0853	10.4321
–O	13:57:10	14:01:40	150	used for predicting bee tree D	4.5	465.75	51.0853	10.4321	51.0817	10.4354
H–	13:59:00	14:04:50	147		5.83	788.94	51.0853	10.4321	51.0793	10.4382
–O	14:02:40	14:08:10		no directional information	5.5	708.75	51.0853	10.4321
V–	14:03:10	14:12:00		no directional information	8.83	1517.94	51.0853	10.4321
–G.2	14:06:30	14:15:24		no directional information	8.9	1534.95	51.0853	10.4321
H–	14:07:40	14:15:00		no directional information	7.33	1153.44	51.0853	10.4321
Bee tree	D
Date	2017-06-19
Time	14:30:00
Feeder location coordinates	51.0821	10.4326
							feeder location coordinates		calculated nest site location coordinates
Individual bee colour code	time feeder left	time when reteurned to feeder	flight direction [°]	notes	round trip time [min]	calculated maximum nest distance [m]	N	E	N	E
–G	15:06:10	15:14:30		no directional information	8.33	1396.44	51.0821	10.4326
–Y.2	15:14:40	15:20:50		no directional information	6.16	869.13	51.0821	10.4326
–G	15:15:50	15:23:30		no directional information	7.66	1233.63	51.0821	10.4326
YY.2	15:18:50	15:26:45		no directional information	7.91667	1296	51.0821	10.4326
HH	15:19:50	15:26:10		no directional information	6.33	910.44	51.0821	10.4326
–Y.2	15:22:40	15:31:30		no directional information	8.83	1517.94	51.0821	10.4326
–G	15:25:30	15:31:30		no directional information	6	830.25	51.0821	10.4326
VV	15:25:50	15:29:50		no directional information	4	344.25	51.0821	10.4326
OO	15:27:20	15:33:50		no directional information	6.5	951.75	51.0821	10.4326
YY.2	15:27:20	15:28:45		discarded, probably error in round trip time	1.41667	-283.5	51.0821	10.4326
HH	15:28:00	15:36:20		no directional information	8.33	1396.44	51.0821	10.4326
YY.2	15:29:30	15:40:30		no directional information	11	2045.25	51.0821	10.4326
R–	15:33:00	15:39:30		no directional information	6.5	951.75	51.0821	10.4326
–Y.2	15:33:30	15:42:00		no directional information	8.5	1437.75	51.0821	10.4326
–G	15:33:40	15:39:30		no directional information	5.83	788.94	51.0821	10.4326
OO	15:34:50	15:42:00		no directional information	7.16	1112.13	51.0821	10.4326
VV	15:39:30	15:45:50		no directional information	6.33	910.44	51.0821	10.4326
HH	15:38:10	15:42:50		no directional information	4.66	504.63	51.0821	10.4326
–W	15:41:00	15:46:10		no directional information	5.16	626.13	51.0821	10.4326
OO	15:43:00	15:47:30		no directional information	4.5	465.75	51.0821	10.4326
–Y	15:43:00	15:49:30		no directional information	6.5	951.75	51.0821	10.4326
HH	15:44:30	15:50:20		no directional information	5.83	788.94	51.0821	10.4326
YY.2	15:45:30	15:56:10		no directional information	10.66	1962.63	51.0821	10.4326
VV	15:47:50	15:54:50		no directional information	7	1073.25	51.0821	10.4326
R–	15:49:30	15:53:50		no directional information	4.33	424.44	51.0821	10.4326
–G	15:48:30	15:53:10		no directional information	4.66	504.63	51.0821	10.4326
OO	15:48:50	15:54:50		no directional information	6	830.25	51.0821	10.4326
–Y	15:51:20	15:57:00		no directional information	5.66	747.63	51.0821	10.4326
HH	15:52:30	15:59:20		no directional information	6.83	1031.94	51.0821	10.4326
OO	15:55:40	16:00:02		no directional information	4.36667	433.35	51.0821	10.4326
R–	15:55:50	15:59:10		used for predicting bee tree D	3.33	181.44	51.0821	10.4326
VV	15:57:00	16:03:00		no directional information	6	830.25	51.0821	10.4326
–W	15:58:40	16:03:00		no directional information	4.33	424.44	51.0821	10.4326
–Y.2	15:58:40	16:02:30		no directional information	3.83	302.94	51.0821	10.4326
R–	16:00:50	16:05:10		no directional information	4.33	424.44	51.0821	10.4326
–G	15:59:50	16:04:10		no directional information	4.33	424.44	51.0821	10.4326
HH	16:00:40	16:05:10		no directional information	4.5	465.75	51.0821	10.4326
Bee tree	D
Date	2017-06-19
Time	17:00:00
Feeder location coordinates	51.0793	10.4313
							feeder location coordinates		calculated nest site location coordinates
Individual bee colour code	time feeder left	time when reteurned to feeder	flight direction [°]	notes	round trip time [min]	calculated maximum nest distance [m]	N	E	N	E
–G	17:57:10	18:10:50		no directional information	13.66	2691.63	51.0793	10.4313
–G	18:12:40	18:24:20		no directional information	11.66	2205.63	51.0793	10.4313
–R	18:17:10	18:23:10		no directional information	6	830.25	51.0793	10.4313
–R	18:25:00	18:31:20		no directional information	6.33	910.44	51.0793	10.4313
–G	18:25:30	18:37:00		no directional information	11.5	2166.75	51.0793	10.4313
–R	18:32:50	18:39:40		no directional information	6.83	1031.94	51.0793	10.4313
–G	18:38:20	18:46:00		no directional information	7.66	1233.63	51.0793	10.4313
–R	18:41:10	18:47:10		no directional information	6	830.25	51.0793	10.4313
–Y	18:45:50	19:14:20		no directional information	28.5	6297.75	51.0793	10.4313
W–	18:46:10	18:55:10		no directional information	9	1559.25	51.0793	10.4313
–G	18:47:20	18:55:10		no directional information	7.83	1274.94	51.0793	10.4313
–R	18:49:50	18:58:10		no directional information	8.33	1396.44	51.0793	10.4313
–B	18:48:40	18:52:40		no directional information	4	344.25	51.0793	10.4313
HH.2	18:53:40	19:00:20		no directional information	6.66	990.63	51.0793	10.4313
–B	18:54:10	18:58:30		no directional information	4.33	424.44	51.0793	10.4313
–G	18:56:40	19:04:00		no directional information	7.33	1153.44	51.0793	10.4313
W–	18:57:10	19:05:10		no directional information	8	1316.25	51.0793	10.4313
–R	18:59:40	19:08:20		no directional information	8.66	1476.63	51.0793	10.4313
–B	18:59:50	19:03:20		no directional information	3.5	222.75	51.0793	10.4313
HH.2	19:01:50	19:07:10		no directional information	5.33	667.44	51.0793	10.4313
–B	19:05:50	19:11:10		no directional information	5.33	667.44	51.0793	10.4313
–G	19:07:10	19:16:20		no directional information	9.16	1598.13	51.0793	10.4313
W–	19:06:40	19:13:20		no directional information	6.66	990.63	51.0793	10.4313
HH.2	19:09:10	19:15:50		no directional information	6.66	990.63	51.0793	10.4313
R–	19:11:20	19:15:50		no directional information	4.5	465.75	51.0793	10.4313
–B	19:12:30	19:17:00		no directional information	4.5	465.75	51.0793	10.4313
W–	19:15:00	19:19:30		no directional information	4.5	465.75	51.0793	10.4313
–Y	19:15:20	19:21:30		no directional information	6.16	869.13	51.0793	10.4313
–B	19:18:30	19:22:30		no directional information	4	344.25	51.0793	10.4313
–G	19:18:20	19:25:50		no directional information	7.5	1194.75	51.0793	10.4313
–R	19:18:50	19:24:10		no directional information	5.33	667.44	51.0793	10.4313
–O.2	19:21:10	19:26:00		no directional information	4.83	545.94	51.0793	10.4313
–W	19:20:30	19:24:40		no directional information	4.16	383.13	51.0793	10.4313
W–	19:20:50	19:25:50		no directional information	5	587.25	51.0793	10.4313
–B	19:23:50	19:27:10	25	used for predicting bee tree D	3.33	181.44	51.0793	10.4313	51.0807	10.4324
–B			5	only directional information			51.0793	10.4313
Bee tree	I
Date	2017-06-20
Time	12:00:00
Feeder location coordinates	51.073	10.4678
							feeder location coordinates		calculated nest site location coordinates
Individual bee colour code	time feeder left	time when reteurned to feeder	flight direction [°]	notes	round trip time [min]	calculated maximum nest distance [m]	N	E	N	E
B–	12:16:00	13:01:50	60		45.83	10508.9	51.073	10.4678	51.1204	10.5983
–G	12:18:20	12:45:30	345		27.16	5972.13	51.073	10.4678	51.125	10.4457
Y–	12:21:00	12:35:10	40		14.16	2813.13	51.073	10.4678	51.0925	10.4938
Y–	12:36:30	12:46:30	25	used for predicting bee tree I	10	1802.25	51.073	10.4678	51.0878	10.4788
–G	12:48:00	13:13:30	355		25.5	5568.75	51.073	10.4678	51.123	10.4609
Y–	12:48:30	12:58:40		no directional information	10.16	1841.13	51.073	10.4678
G–	12:55:40	13:08:30	20		12.83	2489.94	51.073	10.4678	51.0941	10.48
Y–	13:01:30	13:11:30	35		10	1802.25	51.073	10.4678	51.0863	10.4827
B–	13:03:20	13:42:00	60		38.66	8766.63	51.073	10.4678	51.1125	10.5767
R–	13:04:40	13:24:10		no directional information	19.5	4110.75	51.073	10.4678
G–	13:09:10	13:24:20	20		15.16	3056.13	51.073	10.4678	51.0989	10.4828
Y–	13:12:40	13:24:20	25		11.66	2205.63	51.073	10.4678	51.091	10.4812
–G	13:14:40	13:46:20	355		31.66	7065.63	51.073	10.4678	51.1365	10.459
R–	13:25:50	13:48:00		no directional information	22.16	4757.13	51.073	10.4678
Y–	13:25:40	13:35:00		no directional information	9.33	1639.44	51.073	10.4678
Bee tree	-
Date	2017-06-20
Time	17:00:00
Feeder location coordinates	51.0753	10.4855
							feeder location coordinates		calculated nest site location coordinates
Individual bee colour code	time feeder left	time when reteurned to feeder	flight direction [°]	notes	round trip time [min]	calculated maximum nest distance [m]	N	E	N	E
–R	17:56:10	18:33:00		no directional information	36.83	8321.94	51.0753	10.4855
R–	17:58:40	18:16:00	65		17.33	3583.44	51.0753	10.4855	51.089	10.5321				0	0
Y–	18:02:40	18:42:20		no directional information	39.66	9009.63	51.0753	10.4855
R–	18:17:50	18:40:20		no directional information	22.5	4839.75	51.0753	10.4855
–B	18:34:20	19:05:00	195		30.66	6822.63	51.0753	10.4855	51.0159	10.4602
R–	18:34:10	19:20:20	65		46.16	10589.1	51.0753	10.4855	51.1156	10.6231
R–	18:42:20	19:02:30		no directional information	20.16	4271.13	51.0753	10.4855
–G	18:43:50	18:54:40		no directional information	10.83	2003.94	51.0753	10.4855
Y–	18:43:50	19:03:50		no directional information	20	4232.25	51.0753	10.4855
–G	18:58:00	19:06:00	125		8	1316.25	51.0753	10.4855	51.0685	10.501
R–	19:05:00	19:27:00		no directional information	22	4718.25	51.0753	10.4855
Y–	19:06:20	19:21:40		no directional information	15.33	3097.44	51.0753	10.4855
–G	19:07:30	19:19:00	160		11.5	2166.75	51.0753	10.4855	51.057	10.4961
–G	19:20:20	19:29:30	160		9.16	1598.13	51.0753	10.4855	51.0618	10.4933
Y–	19:23:00	19:37:00		no directional information	14	2774.25	51.0753	10.4855
–G	19:30:40	19:41:20		no directional information	10.66	1962.63	51.0753	10.4855
Bee tree	-
Date	2017-06-21
Time	15:00:00
Feeder location coordinates	51.0564	10.4578
							feeder location coordinates		calculated nest site location coordinates
Individual bee colour code	time feeder left	time when reteurned to feeder	flight direction [°]	notes	round trip time [min]	calculated maximum nest distance [m]	N	E	N	E
–B	15:06:00	15:21:10		no directional information	15.16	3056.13	51.0564	10.4578
–B	15:23:10	15:44:00		no directional information	20.83	4433.94	51.0564	10.4578
–B	15:44:40	16:05:00		no directional information	20.33	4312.44	51.0564	10.4578
Bee tree	E
Date	2017-06-21
Time	16:00:00
Feeder location coordinates	51.0575	10.4444
							feeder location coordinates		calculated nest site location coordinates
Individual bee colour code	time feeder left	time when reteurned to feeder	flight direction [°]	notes	round trip time [min]	calculated maximum nest distance [m]	N	E	N	E
Y-	17:07:10	17:18:10		no directional information	11	2045.25	51.0575	10.4444
G-	17:18:20	17:34:30		no directional information	16.16	3299.13	51.0575	10.4444
-Y	17:19:10	17:24:00	27	used for predicting bee tree E	4.83	545.94	51.0575	10.4444	51.0619	10.448
Y-	17:20:30	17:30:20	20		9.83	1760.94	51.0575	10.4444	51.0724	10.453
-Y	17:25:10	17:29:15	32		4.08333	364.5	51.0575	10.4444	51.0603	10.4472
-B	17:27:20	17:34:30	30		7.16	1112.13	51.0575	10.4444	51.0662	10.4524
Y-	17:32:00	17:40:30		no directional information	8.5	1437.75	51.0575	10.4444
-Y	17:31:00	17:36:40	27		5.66	747.63	51.0575	10.4444	51.0635	10.4493
-B	17:35:50	17:47:20		no directional information	11.5	2166.75	51.0575	10.4444
-Y	17:38:15	17:43:40	30		5.41667	688.5	51.0575	10.4444	51.0629	10.4493
Y-	17:42:10	17:49:00		no directional information	6.83	1031.94	51.0575	10.4444
-Y	17:46:00	17:51:30		no directional information	5.5	708.75	51.0575	10.4444
Bee tree	-
Date	2017-08-29
Time	17:00:00
Feeder location coordinates	51.0807	10.425
							feeder location coordinates		calculated nest site location coordinates
Individual bee colour code	time feeder left	time when reteurned to feeder	flight direction [°]	notes	round trip time [min]	calculated maximum nest distance [m]	N	E	N	E
R-	17:20:50	17:29:30	105		8.66	1476.63	51.0807	10.425	51.0773	10.4455
G-	17:26:50	17:37:00		no directional information	10.16	1841.13	51.0807	10.425
Y-	17:28:40	17:41:00	78		12.33	2368.44	51.0807	10.425	51.0852	10.4583
R-	17:30:30	17:38:20	110		7.83	1274.94	51.0807	10.425	51.0768	10.4422
B-	17:33:50	17:42:40	112		8.83	1517.94	51.0807	10.425	51.0756	10.4452
R-	17:39:40	17:47:30		no directional information	7.83	1274.94	51.0807	10.425
G-	17:41:30	17:49:20	110		7.83	1274.94	51.0807	10.425	51.0768	10.4422
Y-	17:44:00	17:53:45		no directional information	9.75	1741.5	51.0807	10.425
B-	17:43:30	17:50:50	110		7.33	1153.44	51.0807	10.425	51.0772	10.4406
-R	17:44:50	17:55:15	112		10.4167	1903.5	51.0807	10.425	51.0743	10.4503
R-	17:49:15	17:57:50		no directional information	8.58333	1458	51.0807	10.425
G-	17:50:45	18:05:30		no directional information	14.75	2956.5	51.0807	10.425
B-	17:52:50	18:01:30		no directional information	8.66	1476.63	51.0807	10.425
Y-	17:54:20	18:04:00		no directional information	9.66	1719.63	51.0807	10.425
-R	17:56:30	18:06:20		no directional information	9.83	1760.94	51.0807	10.425
R-	17:59:20	18:07:40		no directional information	8.33	1396.44	51.0807	10.425
B-	18:03:30	18:11:30		no directional information	8	1316.25	51.0807	10.425
Y-	18:04:50	18:12:40	78		7.83	1274.94	51.0807	10.425	51.0831	10.4429
Bee tree	F
Date	2017-08-30
Time	10:00:00
Feeder location coordinates	51.0649	10.4581
							feeder location coordinates		calculated nest site location coordinates
Individual bee colour code	time feeder left	time when reteurned to feeder	flight direction [°]	notes	round trip time [min]	calculated maximum nest distance [m]	N	E	N	E
R-	10:05:30	10:15:10		no directional information	9.66	1719.63	51.0649	10.4581
G-	10:05:30	10:16:20		no directional information	10.83	2003.94	51.0649	10.4581
Y-	10:05:50	10:15:30		no directional information	9.66	1719.63	51.0649	10.4581
B-	10:08:30	10:27:20		no directional information	18.83	3947.94	51.0649	10.4581
-Y	10:13:20	10:23:30		no directional information	10.16	1841.13	51.0649	10.4581
R-	10:17:00	10:27:50		no directional information	10.83	2003.94	51.0649	10.4581
Y-	10:17:10	10:29:00	145		11.83	2246.94	51.0649	10.4581	51.0484	10.4766
-G	10:16:40	10:36:30		no directional information	19.83	4190.94	51.0649	10.4581
G-	10:17:30	10:27:00		no directional information	9.5	1680.75	51.0649	10.4581
BB	10:20:50	10:41:50		no directional information	21	4475.25	51.0649	10.4581
-Y	10:25:20	10:38:00	150		12.66	2448.63	51.0649	10.4581	51.0458	10.4756
YB	10:27:50	10:42:00		no directional information	14.16	2813.13	51.0649	10.4581
G-	10:28:20	10:36:30	140	used for predicting bee tree F	8.16	1355.13	51.0649	10.4581	51.0556	10.4706
B-	10:28:50	10:46:20		no directional information	17.5	3624.75	51.0649	10.4581
G-	10:37:30	10:49:30	140		12	2288.25	51.0649	10.4581	51.0491	10.4792
-G	10:38:00	10:56:20	140		18.33	3826.44	51.0649	10.4581	51.0385	10.4933
-Y	10:39:00	10:49:50	145		10.83	2003.94	51.0649	10.4581	51.0502	10.4746
R-	10:40:30	10:52:00		no directional information	11.5	2166.75	51.0649	10.4581
Y-	10:43:20	10:54:00	150		10.66	1962.63	51.0649	10.4581	51.0496	10.4722
YB	10:44:10	10:56:30		no directional information	12.33	2368.44	51.0649	10.4581
G-	10:50:40	10:59:40	150		9	1559.25	51.0649	10.4581	51.0528	10.4693
-Y	10:51:20	11:02:30	150		11.16	2084.13	51.0649	10.4581	51.0487	10.473
Y-	10:55:30	11:04:20		no directional information	8.83	1517.94	51.0649	10.4581
G-			135	only directional information			51.0649	10.4581
Bee tree	-
Date	2017-08-30
Time	15:00:00
Feeder location coordinates	51.0955	10.4304
							feeder location coordinates		calculated nest site location coordinates
Individual bee colour code	time feeder left	time when reteurned to feeder	flight direction [°]	notes	round trip time [min]	calculated maximum nest distance [m]	N	E	N	E
W-	15:34:30	15:54:50	355		20.33	4312.44	51.0955	10.4304	51.1342	10.425
-W	15:46:20	16:14:30	5		28.16	6215.13	51.0955	10.4304	51.1513	10.4381
-W			355	only directional information			51.0955	10.4304
Bee tree	H
Date	2017-08-30
Time	16:00:00
Feeder location coordinates	51.0574	10.4089
							feeder location coordinates		calculated nest site location coordinates
Individual bee colour code	time feeder left	time when reteurned to feeder	flight direction [°]	notes	round trip time [min]	calculated maximum nest distance [m]	N	E	N	E
YB	16:28:00	16:37:50		no directional information	9.83	1760.94	51.0574	10.4089
BR	16:32:50	16:43:10		no directional information	10.33	1882.44	51.0574	10.4089
-Y	16:33:50	16:45:00	262.5		11.16	2084.13	51.0574	10.4089	51.055	10.3793
-R	16:39:50	16:48:10		no directional information	8.33	1396.44	51.0574	10.4089
YB	16:38:50	16:50:10	262.5		11.33	2125.44	51.0574	10.4089	51.0549	10.3787
BR	16:45:00	16:54:10		no directional information	9.16	1598.13	51.0574	10.4089
-Y	16:46:50	16:56:20	260		9.5	1680.75	51.0574	10.4089	51.0548	10.3852
-R	16:49:00	16:57:00	270		8	1316.25	51.0574	10.4089	51.0574	10.3901
YB	16:52:20	17:24:20	260		32	7148.25	51.0574	10.4089	51.0462	10.308
BR	16:56:00	17:05:00		no directional information	9	1559.25	51.0574	10.4089
G-	16:57:40	17:08:45		no directional information	11.0833	2065.5	51.0574	10.4089
-Y	16:58:00	17:06:40		no directional information	8.66	1476.63	51.0574	10.4089
-R	17:01:00	17:18:10	262.5		17.16	3542.13	51.0574	10.4089	51.0532	10.3586
-B	17:08:00	17:17:40	262.5		9.66	1719.63	51.0574	10.4089	51.0554	10.3845
-Y	17:08:00	17:17:40		no directional information	9.66	1719.63	51.0574	10.4089
-G	17:10:00	17:23:10		no directional information	13.16	2570.13	51.0574	10.4089
G-	17:10:30	17:20:50	245		10.33	1882.44	51.0574	10.4089	51.0502	10.3845
-B	17:19:50	17:26:40	260	used for predicting bee tree H	6.83	1031.94	51.0574	10.4089	51.0558	10.3944
-R	17:20:00	17:35:10		no directional information	15.16	3056.13	51.0574	10.4089
BR	17:19:10	17:27:50	265		8.66	1476.63	51.0574	10.4089	51.0563	10.3879
-Y	17:19:00	17:29:00	260		10	1802.25	51.0574	10.4089	51.0546	10.3835
G-	17:22:00	17:37:00	265		15	3017.25	51.0574	10.4089	51.055	10.3659
-G	17:25:00	17:33:20	275		8.33	1396.44	51.0574	10.4089	51.0585	10.389
YB			270	only directional infromation			51.0574	10.4089
-B	17:28:30	17:36:30	260		8	1316.25	51.0574	10.4089	51.0554	10.3904
YB	18:10:00	18:19:20		no directional information	9.33	1639.44	51.0574	10.4089
BR	18:12:20	18:21:30	260		9.16	1598.13	51.0574	10.4089	51.0549	10.3864
G-			260				51.0574	10.4089
-B	18:14:40	18:22:10		no directional information	7.5	1194.75	51.0574	10.4089
-G	18:17:00	18:24:30		no directional information	7.5	1194.75	51.0574	10.4089
-Y	18:18:30	18:27:00	260		8.5	1437.75	51.0574	10.4089	51.0552	10.3886
BR			260	only directional infromation			51.0574	10.4089
-B	18:24:40	18:32:40	260		8	1316.25	51.0574	10.4089	51.0554	10.3904
-G	18:26:00	18:35:10	260		9.16	1598.13	51.0574	10.4089	51.0549	10.3864
-Y	18:28:50	18:37:30	260		8.66	1476.63	51.0574	10.4089	51.0551	10.3881
Bee tree	G
Date	2017-08-30
Time	18:00:00
Feeder location coordinates	51.0941	10.4905
							feeder location coordinates		calculated nest site location coordinates
Individual bee colour code	time feeder left	time when reteurned to feeder	flight direction [°]	notes	round trip time [min]	calculated maximum nest distance [m]	N	E	N	E
W-	17:58:10	18:14:30	115		16.33	3340.44	51.0941	10.4905	51.0814	10.5339
W-	18:17:10	18:26:00	110	used for predicting bee tree G	8.83	1517.94	51.0941	10.4905	51.0894	10.5109
W-	18:27:30	18:39:40	117		12.16	2327.13	51.0941	10.4905	51.0846	10.5202
W-	18:41:30	18:52:30	110		11	2045.25	51.0941	10.4905	51.0878	10.518
